# Supplementary material for: Accelerating electrosynthesis of ammonia from nitrates using coupled NiO/Cu nanocomposites
Source: Royal Society of Chemistry journal article supplement (doi:10.1039/d3cc05928f), 2024-01-01
Supplement: d3cc05928f1.pdf [file d3cc05928f1.pdf]

## Electronic supplementary information

# Accelerating Electrosynthesis of Ammonia from Nitrates Using Coupled NiO/Cu Nanocomposites

Hongbo Zhu,<sup>ab</sup> Yanfeng Tang,<sup>c</sup> Jiacheng Jayden Wang,<sup>b</sup> Tongming Sun,<sup>c</sup> Minmin Wang,<sup>c</sup> Jin Wang,<sup>c</sup> Yongwen Tan,<sup>a\*</sup> and Jiacheng Wang<sup>bd\*</sup>

<sup>a</sup> College of Materials Science and Engineering, Hunan University, Changsha, Hunan 410082, China

<sup>b</sup> State Key Laboratory of High Performance Ceramics and Superfine Microstructure, Shanghai Institute of Ceramics, Chinese Academy of Sciences, Shanghai 201899, China

<sup>c</sup> School of Chemistry and Chemical Engineering, Nantong University, Nantong 226019, Jiangsu, China.

<sup>d</sup> School of Materials Science and Engineering, Taizhou University, Taizhou 318000, Zhejiang, China

Email: [jiacheng.wang@mail.sic.ac.cn](mailto:jiacheng.wang@mail.sic.ac.cn); [tanyw@hnu.edu.cn](mailto:tanyw@hnu.edu.cn)

## **EXPERIMENTAL SECTION:**

### **Chemicals and reagents**

Nickel nitrate hexahydrate ( $\text{Ni}(\text{NO}_3)_2 \cdot 6\text{H}_2\text{O}$ ), copper nitrate trihydrate ( $\text{Cu}(\text{NO}_3)_2 \cdot 3\text{H}_2\text{O}$ ), ammonium chloride ( $\text{NH}_4\text{Cl}$ ), ethanol ( $\text{C}_2\text{H}_5\text{OH}$ ), potassium nitrate ( $\text{KNO}_3$ ), potassium nitrite ( $\text{KNO}_2$ ), hydrochloric acid ( $\text{HCl}$ ), potassium hydroxide ( $\text{KOH}$ ) and Nessler's reagent were purchased from Sinopharm Chemical Reagent Co., LTD. All reagents were received as the analytical grade and used without any purification.

### **Pretreatment of Cu foam (CF)**

Pieces of CFs ( $1 \times 1 \text{ cm}^2$ ) were cleaned in an ultrasonic bath of 0.1 mol/L HCl for 10 min to remove the oxides on the surface. Then, they were washed using deionized water and absolute ethanol in sequence under ultrasonication. Wet CF is preserved by immersion in refresh absolute ethanol at room temperature.

### **Synthesis of NiO/Cu**

After cleaning, the CF was dried in a vacuum drying oven at a temperature of  $80^\circ\text{C}$  for 12 hours. Then, it was heated in a tube furnace at a rate of  $3^\circ\text{C}/\text{min}$  in an air atmosphere until reaching a temperature of  $400^\circ\text{C}$ . The heating was maintained for a duration of 3 hours to obtain CuO nanowires (NWs). The CuO NWs was used as the working electrode, the parallel carbon rod was used as the counter electrode, and calomel was used as the reference electrode. The Cu NWs were obtained by electrochemical reduction of CuO NWs at  $-0.6 \text{ V}$  vs. RHE in a standard three-electrode electrochemical cell for 30 min. Then, the co-electric deposition was performed in a standard three-electrode electrochemical cell with Cu NWs as the working electrode, parallel-placed carbon rods as the opposite electrode, and calomel as the reference electrode. The electrolyte consists of  $\text{XNO}_3$  ( $\text{X} = \text{Ni}, \text{Fe}, \text{Co}$ ) and  $\text{Cu}(\text{NO}_3)_2 \cdot 3\text{H}_2\text{O}$  dissolved in 100 ml deionized water with a stoichiometric number of 5.5 mmol. Constant current electrodeposition was then carried out at  $-100 \text{ mA}$  at  $25^\circ\text{C}$ . The deposition time for synthesize NiO/Cu is 15 minutes. After co-electric deposition, NiO/Cu and other nanocomposites were carefully removed from the electrolyte, rinsed with water and ethanol, and then dried overnight at  $60^\circ\text{C}$ .

### **Structural and surface characterization**

Scanning electron microscopy (SEM) images were collected on a field emission scanning electron microscope (FEI Magellan 400 L XHR). Transmission electron microscopy (TEM), high-resolution TEM (HRTEM), high-angle annular darkfield scanning TEM (HAADF-STEM) and energy-dispersive X-ray spectroscopy (EDS) mapping were obtained on the Titan G 260-300. Surface composition and chemical state were revealed by thermodynamic X-ray photoelectron spectroscopy (XPS) measurements using an AXIS ULTRA DLD electron spectrometer (voltage: 15 kV, current: 10 mA, full spectrum flux: 160, narrow spectrum flux: 40, monochromatic aluminum target). X-ray diffraction (XRD) measurements were performed on the Bruker D8 ADVANCE X-ray diffractometer.

### **Electrochemical measurements**

All measurements were performed at 25 °C in an H-type electrolyzer using a CHI 760 E electrochemical workstation. In the three-electrode electrochemical cell, the prepared material was used as the working electrode (1 cm × 1 cm), the carbon rod was used as the counter electrode, and the calomel electrode was used as the reference electrode. Fumasep FAB-PK-130 was used as an anion exchange membrane. All potentials in this paper were converted to the potentials vs. reversible hydrogen electrode (RHE) through the equation  $E_{\text{RHE}} = E_{\text{SCE}} + 0.244 + 0.0592\text{pH}$ . The NO<sub>3</sub>RR and NO<sub>2</sub>RR performances of the catalytic materials were tested in 1 M KOH with 0.1M KNO<sub>3</sub>/0.1M KNO<sub>2</sub> by linear sweep voltammetry (LSV) with a scanning rate of 5mV·s<sup>-1</sup>. The specific test conditions for EIS are as follows: the starting voltage (V) is the voltage corresponding to 10 mA·cm<sup>-2</sup>, the high frequency (Hz) is 100,000, the low frequency (Hz) is 1, the amplitude (V) is 0.005, and the quiet time (sec) is 2 seconds.

### **Detection of NH<sub>4</sub><sup>+</sup>**

The quantification of NH<sub>4</sub><sup>+</sup> was conducted with Nessler's reagent as the coloring agent. 0.2 mL electrolyte after NO<sub>3</sub>-RR was first taken out from the cathodic compartment and diluted to 5 mL. Then, potassium sodium tartrate solution (500 g L<sup>-1</sup>, 0.1 mL) was added and thoroughly mixed. In the last step, 0.1 mL of Nessler's reagent was added to the above mixture. After being left standing for 20 min, the absorbance at 420 nm was measured by UV-spectroscopy (PG200-Pro back-thinned spectrometer,

ideaoptics, China). The obtained value was then fitted to the calibration curve to acquire the corresponding  $\text{NH}_4^+$  concentration.

The  $\text{NH}_4^+$  was calculated as follows:

$$\text{Yield } \text{NH}_4^+ = (C_{\text{NH}_4^+} \times V) / (t \times S)$$

The Faradaic efficiency was calculated as follows:

$$\text{Faradaic efficiency} = (8F \times C_{\text{NH}_4^+} \times V) / (M_{\text{NH}_4^+} \times Q)$$

where  $C_{\text{NH}_4^+}$  is the mass concentration of  $\text{NH}_4^+(\text{aq})$ ,  $V$  is the volume of electrolyte in the cathode compartment,  $t$  is the electrolysis time,  $S$  is the geometric area of working electrode,  $F$  is the Faraday constant ( $96485 \text{ C}\cdot\text{mol}^{-1}$ ),  $M_{\text{NH}_4^+}$  is the molar mass of  $\text{NH}_4^+$ , and  $Q$  is the total charge passing the electrode.

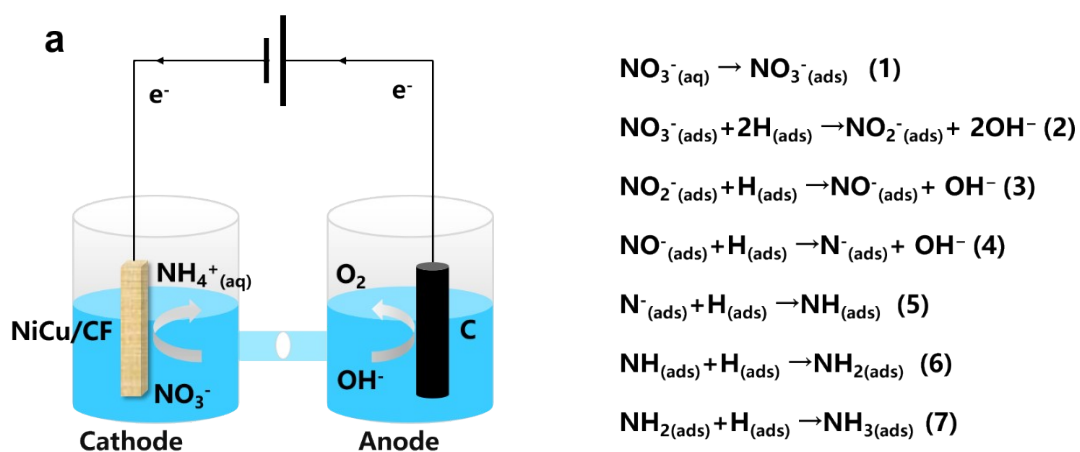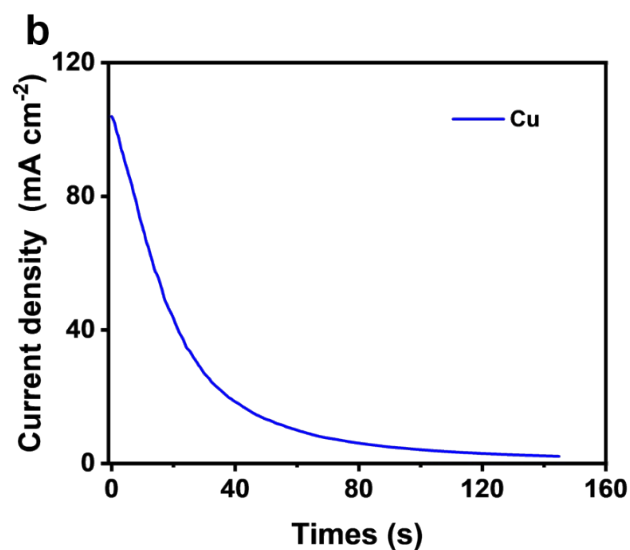

**Figure S1a.** Schematic showing the conversion of waste  $\text{NO}_3^-$  (from industry and agriculture) to  $\text{NH}_3$  via the electrochemical nitrate reduction reaction ( $\text{NO}_3\text{RR}$ ) pathway with relevant reaction steps. b, The poisoning phenomenon of Cu

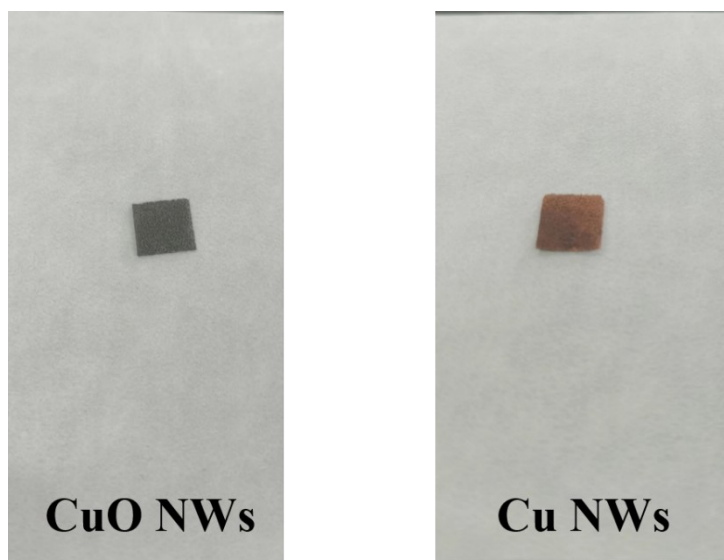

**Figure S2.** (left) CuO NWs on CF prepared by heattreatment of CF in air at 400 °C and (right) the Cu NWs on CF prepared by electro-reduction of CuO NWs on CF

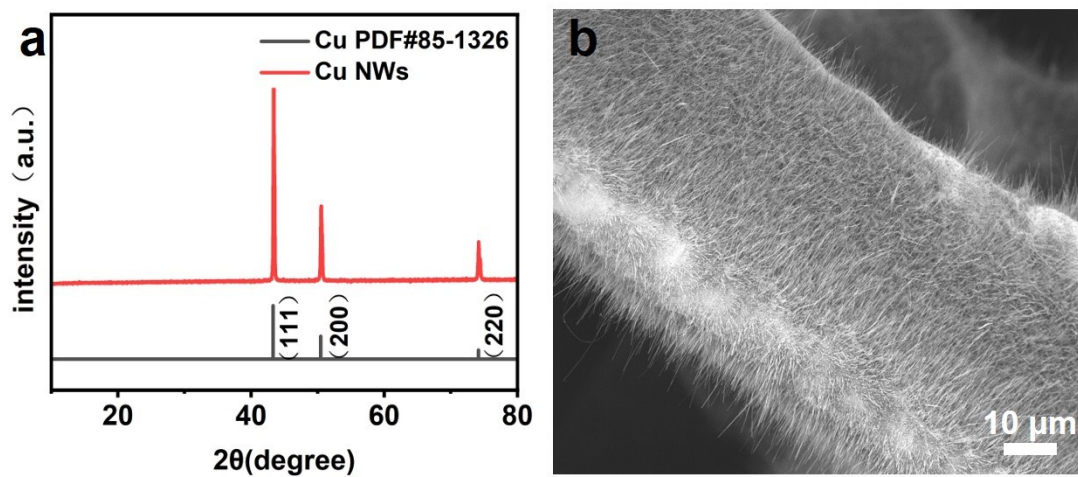

**Figure S3.** a) XRD image of the CuO NWs obtained by reduction.; b) SEM image of

CuO NWs.

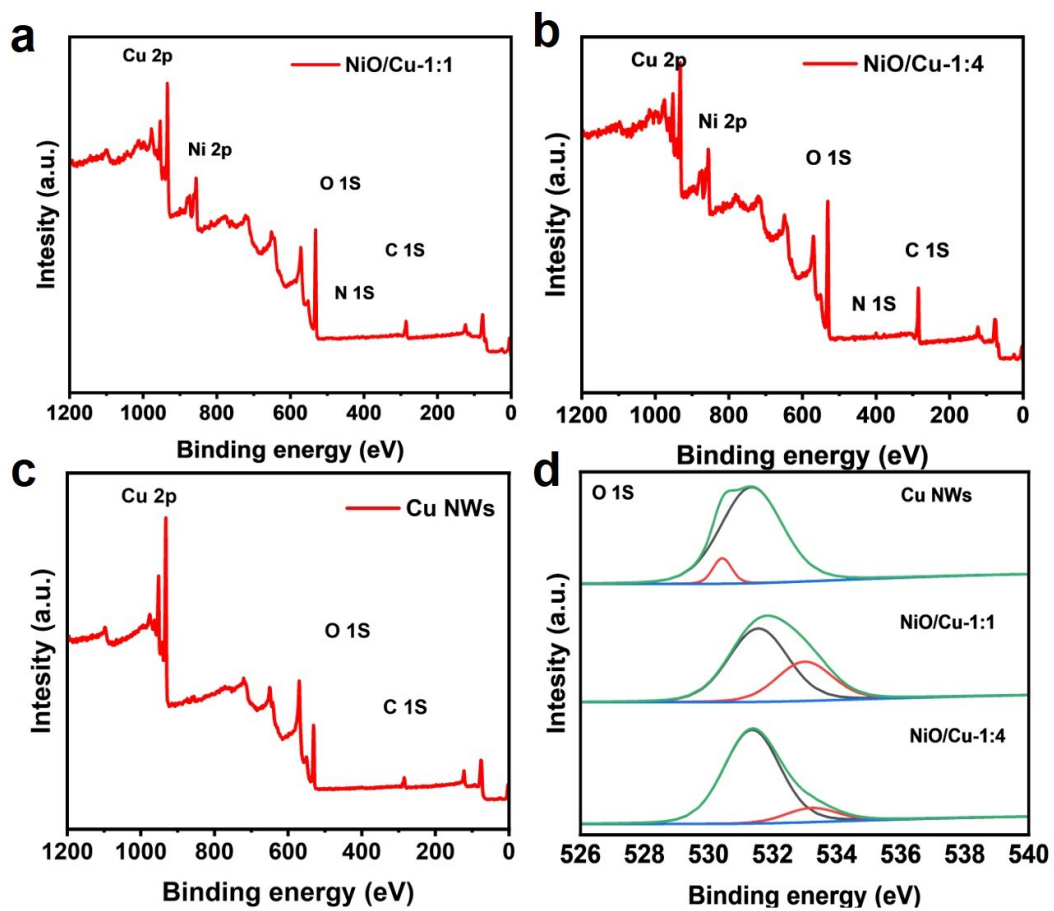

**Figure S4.** a-c) XPS spectra of NiO/Cu (1:1), NiO/Cu (1:1) and Cu NWs; d) O 1S XPS spectra of NiO/Cu (1:1), NiO/Cu (1:4) and Cu NWs.



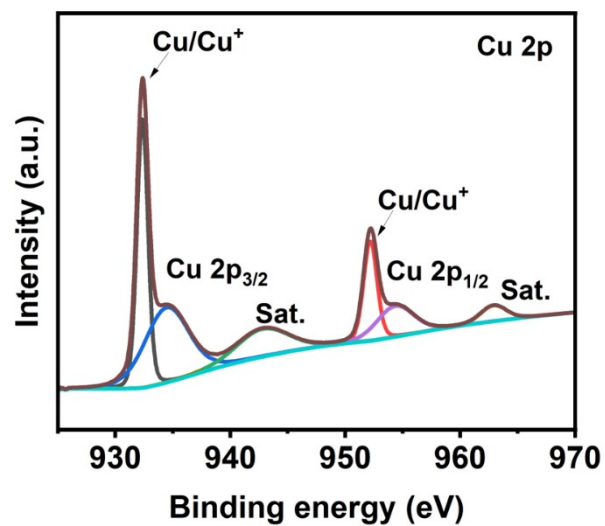

**Figure S5.** Cu 2p XPS spectrum of Cu NWs prepared by electro-reduction of CuO NWs.

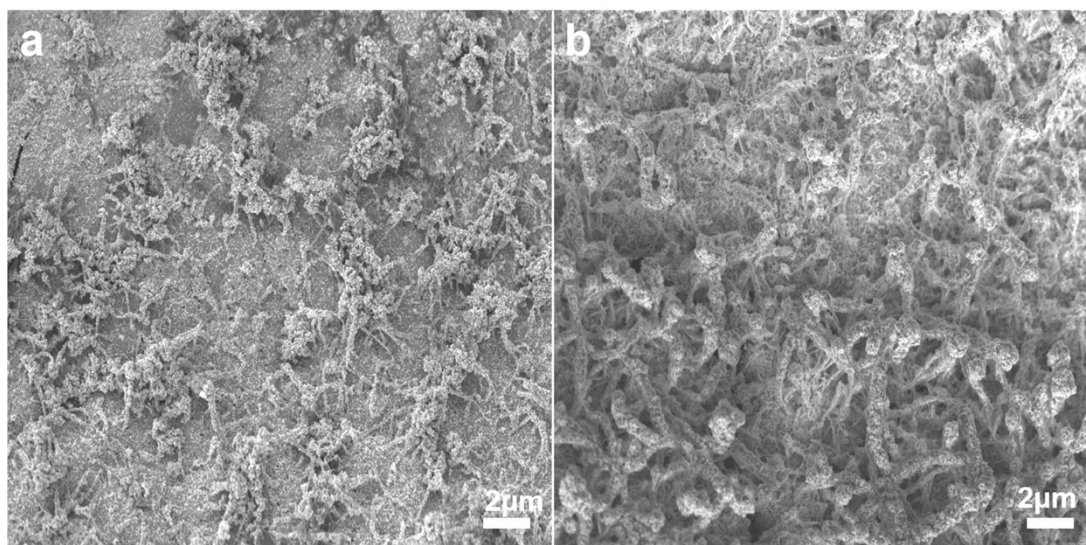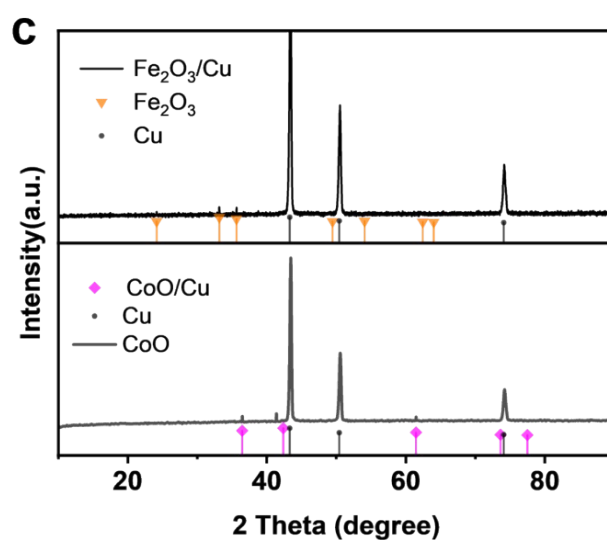

**Figure S6.** a)  $\text{Fe}_2\text{O}_3/\text{Cu}$ -1:1 composite catalyst obtained by electrodeposition and b)  $\text{CoO}/\text{Cu}$ -1:1 composite catalyst obtained by electrodeposition. c) XRD spectra corresponding to  $\text{Fe}_2\text{O}_3/\text{Cu}$ -1:1 and  $\text{CoO}/\text{Cu}$ -1:1.

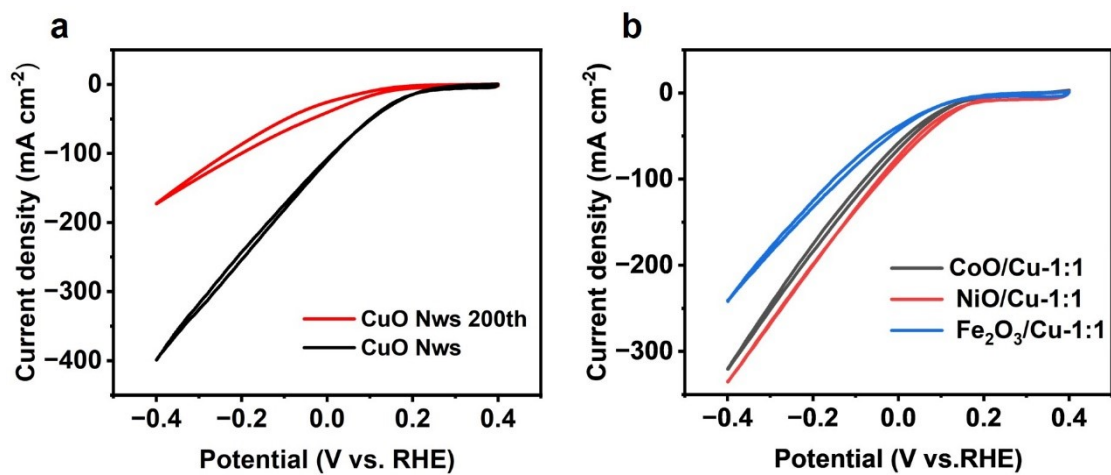

**Figure S7.** a) CV curves of CuO NWs in 1 M KOH electrolyte containing 0.1 M KNO<sub>3</sub> after 200 cycles. b) CV curves of different electrocatalysts in 1 M KOH electrolyte containing 0.1 M KNO<sub>3</sub> after 200 cycles (CoO/Cu-1:1, NiO/Cu-1:1 and Fe<sub>2</sub>O<sub>3</sub>/Cu-1:1).

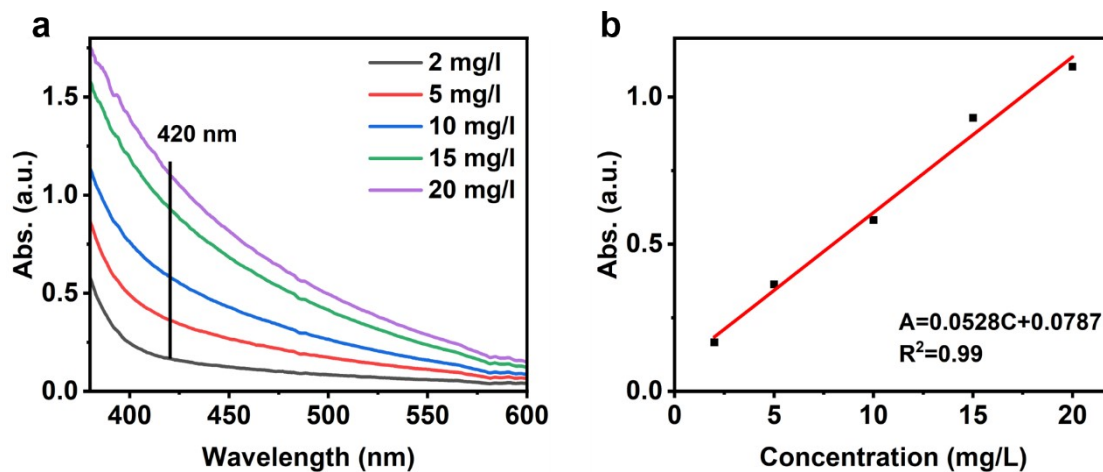

**Figure S8.** UV-Vis curves and calibration curves for determining  $\text{NH}_4^+$ . 1 mL  $\text{NH}_4\text{Cl}$  standard solution was diluted to 5 mL for test.

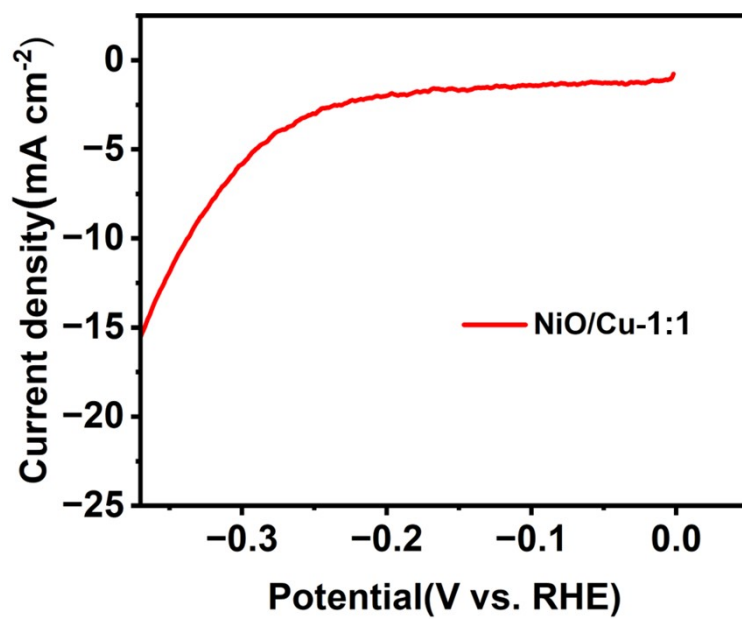

**Figure S9.** HER performance of NiO/Cu-1:1 catalyst.

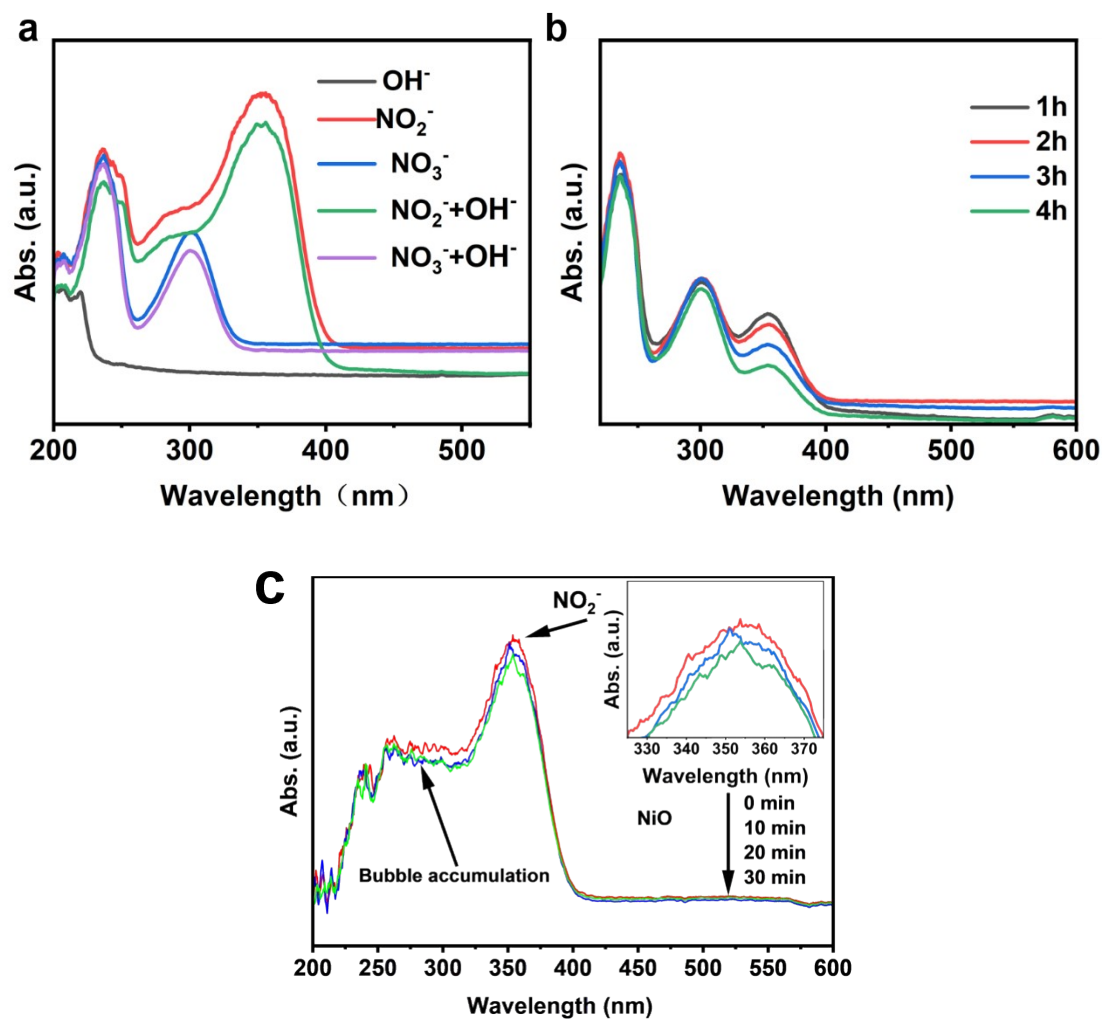

**Figure S10.** a) UV spectra for different kinds of anions. b) The four reaction cycles for the electrolytes detected by the UV spectrum. c) In situ ultraviolet–visible (UV–Vis) spectroscopy measurements of  $\text{NO}_2^-$  reduction on NiO NWs in 1 M KOH with 0.1 M  $\text{KNO}_2$  electrolyte.

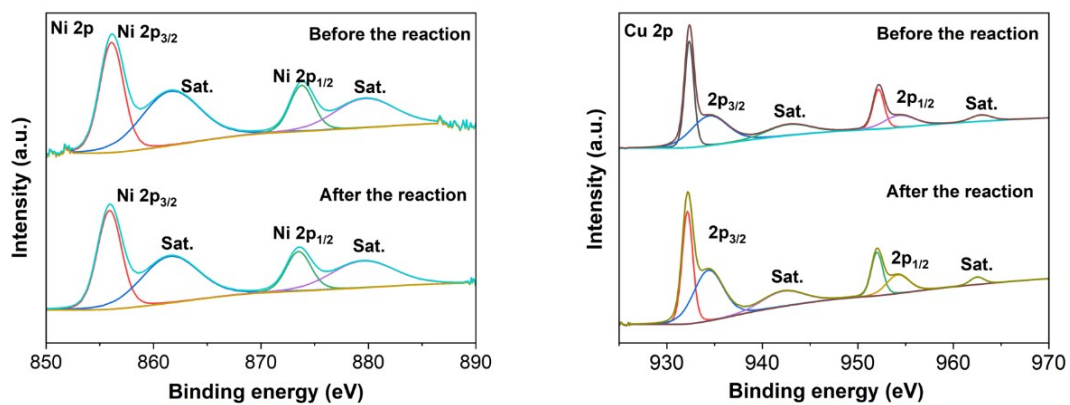

**Figure S11.** Ni and Cu 2p XPS spectra before and after the reaction.

**Table S1** The standard reduction potentials of metals.

| <b>Reaction</b>            | <b>Standard potential/V</b> |
|----------------------------|-----------------------------|
| $\text{Ni}^{2+}/\text{Ni}$ | -0.257                      |
| $\text{Cu}^{2+}/\text{Cu}$ | 0.342                       |



**Table S2** Comparison of NO<sub>3</sub>RR performance for some recently reported electrocatalysts in alkaline electrolytes.

| Catalysts                            | Electrolytes                                                                   | NH <sub>3</sub> yield rate                                         | Faradaic Efficiency (%) | Reference                                                           |
|--------------------------------------|--------------------------------------------------------------------------------|--------------------------------------------------------------------|-------------------------|---------------------------------------------------------------------|
| NiO/Cu/CF                            | 1 M KOH + 0.1 M KNO <sub>3</sub>                                               | 455 mg h <sup>-1</sup> cm <sup>-2</sup> @ -0.3 V vs. RHE           | 97                      | This work                                                           |
| CuCoSP                               | 0.1M KOH +0.01M KNO <sub>3</sub>                                               | 1.17mmol cm <sup>-2</sup> h <sup>-1</sup> @ -0.175 V vs. RHE       | 92.8                    | Nat. Commun., 2022, 13, 1129. <sup>1</sup>                          |
| Cu/Cu <sub>2</sub> O NWAs on Cu mesh | 0.5 M Na <sub>2</sub> SO <sub>4</sub> and 200 ppm NO <sub>3</sub> <sup>-</sup> | 0.2449 mmol cm <sup>-2</sup> h <sup>-1</sup> @ -0.85 V vs. RHE     | 81                      | Angew. Chem. Int. Ed., 2020, 59, 5350-5354. <sup>2</sup>            |
| Cu <sub>2</sub> O Ar-40              | 0.5M Na <sub>2</sub> SO <sub>4</sub> + 200 ppm NO <sub>3</sub> <sup>-</sup>    | 0.0699 mmol cm <sup>-2</sup> h <sup>-1</sup> @ - 1.2 V vs. Ag/AgCl | 89.54                   | Applied Catalysis B: Environmental, 2022, 305, 121021. <sup>3</sup> |
| CuFe-450                             | 1 M KOH + 100 mM HNO <sub>3</sub>                                              | 30 mg cm <sup>-2</sup> h <sup>-1</sup> @ -0.8 V vs. RHE            | 90.6                    | Chem Catalysis, 2022, 4                                             |
| Fe-cyano-R NSs                       | 1 M KOH + 100 mM HNO <sub>3</sub>                                              | 1.5mmol cm <sup>-2</sup> h <sup>-1</sup> @ -0.6 V vs. RHE          | 90.2                    | ACS Nano, 2022, 2, 1072–1081. <sup>5</sup>                          |
| CoP NAs/CFC                          | 1.0 M NaOH + 1.0 M NaNO <sub>3</sub>                                           | 15.44 mol m <sup>-2</sup> h <sup>-1</sup> @ -0.6 V vs. RHE         | ~100                    | Energy Environ. Sci., 2022, 15, 760-770. <sup>6</sup>               |
| CoO <sub>x</sub>                     | 0.1 M KOH +100 mM HNO <sub>3</sub>                                             | 82.4 mg h <sup>-1</sup> mg <sup>-1</sup> cat @ -0.3 V vs. RHE      | 93.4                    | ACS Catal., 2021, 11, 15135-15140. <sup>7</sup>                     |
| Cu-NBs-100                           | 1 M KOH + 0.1 M KNO <sub>3</sub>                                               | 650 mmol g <sup>-1</sup> cath <sup>-1</sup> @ -0.15 V vs. RHE      | 95                      | Energy Environ. Sci., 2021, 14, 4989-4997. <sup>8</sup>             |
| R-NiCu-OH                            | 1 M KOH + 0.1 M KNO <sub>3</sub>                                               | 23 mg cm <sup>-2</sup> h <sup>-1</sup> @ -0.1 V vs. RHE            | 72                      | Energy Environ. Sci., 2022, 15, 3004. <sup>9</sup>                  |

|                                           |                                                                                        |                                                                                                     |                                         |                                                                  |
|-------------------------------------------|----------------------------------------------------------------------------------------|-----------------------------------------------------------------------------------------------------|-----------------------------------------|------------------------------------------------------------------|
| TiO <sub>2-x</sub>                        | 50 ppm NO <sub>3</sub> <sup>-</sup><br>+ 0.5 M<br>Na <sub>2</sub> SO <sub>4</sub>      | 0.045 mmol h <sup>-1</sup><br>cm <sup>-2</sup><br>at -1.6 V vs.<br>SCE                              | 85                                      | ACS Catal. 2020, 10,<br>3533-3540. <sup>10</sup>                 |
| Strained Ru<br>nanoclusters               | 1 M KOH +<br>1 M KNO <sub>3</sub>                                                      | 1.17 mmol h <sup>-1</sup><br>cm <sup>-2</sup> at -0.8 V<br>vs. RHE                                  | 100                                     | J. Am. Chem. Soc.<br>2020, 142, 7036-<br>7046. <sup>11</sup>     |
| Ti foil                                   | 0.4M NO <sub>3</sub> <sup>-</sup><br>at pH~0.77                                        |                                                                                                     | 82                                      | ACS Sustain. Chem.<br>Eng. 2020, 8, 2672-<br>2681. <sup>12</sup> |
| Copper-<br>molecular<br>solid<br>catalyst | 0.1 M PBS<br>solution<br>(pH7)<br>contained<br>500 ppm<br>NO <sub>3</sub> <sup>-</sup> | 0.0514 mmol<br>h <sup>-1</sup> cm <sup>-2</sup> at -0.6<br>V vs. RHE                                | 85.9                                    | Nat. Energy 2020, 5,<br>605-613. <sup>13</sup>                   |
| Copper-<br>nickel alloys                  | 1 M KOH<br>containing<br>0.1 M KNO <sub>3</sub>                                        | 170 mA cm <sup>-2</sup> at<br>-0.15 V vs.<br>RHE using<br>rotating disk<br>electrodes at<br>100 rpm | 99                                      | J. Am. Chem. Soc.<br>2020, 142, 5702-<br>5708. <sup>14</sup>     |
| A single-site<br>iron                     | 0.1 M KOH<br>containing<br>0.1 M KNO <sub>3</sub>                                      | 0.161 mmol h <sup>-1</sup><br>cm <sup>-2</sup> at -0.7 V<br>vs. RHE                                 | nearly 100%<br>after - 0.3 V<br>vs. RHE | Energy Environ. Sci.<br>2021,14, 3522-3531. <sup>15</sup>        |
| Fe single<br>atom                         | 0.50 M<br>KNO <sub>3</sub> / 0.10<br>M K <sub>2</sub> SO <sub>4</sub>                  | 0.46 mmol h <sup>-1</sup><br>cm <sup>-2</sup> at -0.85 V<br>vs. RHE                                 | ~ 75                                    | Nat. Commun. 2021,<br>12, 2870. <sup>16</sup>                    |
| Ru SA on<br>N-doped<br>carbon             | 0.05 M<br>H <sub>2</sub> SO <sub>4</sub><br>electrolyte                                | 0.0018 mmol<br>cm <sup>-2</sup> h <sup>-1</sup> at -0.2<br>V vs. RHE                                | 29.6% at<br>-0.2 V vs.<br>RHE           | Adv. Mater. 2018, 30,<br>1803498. <sup>17</sup>                  |
| Rh@Cu-<br>0.6%                            | 0.1 M<br>Na <sub>2</sub> SO <sub>4</sub> (pH<br>11.5)+0.1 M<br>KNO <sub>3</sub>        | 1.27 mmol h <sup>-1</sup><br>cm <sup>-2</sup><br>at -0.4 V vs.<br>RHE                               | 93%<br>at -0.2 V vs.<br>RHE             | Angew. Chem. Int. Ed.<br>2022, 61,<br>e202202556. <sup>18</sup>  |

**Table S3** Comparison of NO<sub>3</sub>RR performance for Cu-based catalysts.

|  |  |  |                 |  |
|--|--|--|-----------------|--|
|  |  |  | <b>Faradaic</b> |  |
|--|--|--|-----------------|--|

|                                            |                                                                                         |                                                                             | Efficiency (%)              |                                                              |
|--------------------------------------------|-----------------------------------------------------------------------------------------|-----------------------------------------------------------------------------|-----------------------------|--------------------------------------------------------------|
| CuCoSP                                     | 0.1M KOH<br>+0.01M<br>KNO <sub>3</sub>                                                  | 1.17mmol<br>cm <sup>-2</sup> h <sup>-1</sup><br>@ -0.175 V<br>vs. RHE       | 92.8                        | Nat. Commun., 2022,<br>13, 1129.                             |
| Cu/Cu <sub>2</sub> O<br>NWAs on<br>Cu mesh | 0.5 M<br>Na <sub>2</sub> SO <sub>4</sub> and<br>200 ppm<br>NO <sub>3</sub> <sup>-</sup> | 0.2449 mmol<br>cm <sup>-2</sup> h <sup>-1</sup> @ -0.85<br>V vs.<br>RHE     | 81                          | Angew. Chem. Int.<br>Ed., 2020, 59, 5350-<br>5354.           |
| Cu <sub>2</sub> O Ar-<br>40                | 0.5M<br>Na <sub>2</sub> SO <sub>4</sub><br>+ 200 ppm<br>NO <sub>3</sub> <sup>-</sup>    | 0.0699 mmol<br>cm <sup>-2</sup> h <sup>-1</sup> @ - 1.2<br>V vs.<br>Ag/AgCl | 89.54                       | Applied Catalysis B:<br>Environmental, 2022,<br>305, 121021. |
| CuFe-450                                   | 1 M KOH<br>+ 100 mM<br>HNO <sub>3</sub>                                                 | 30 mg cm <sup>-2</sup> h <sup>-1</sup><br>@ -0.8 V vs.<br>RHE               | 90.6                        | Chem Catalysis, 2022,                                        |
| Cu-NBs-<br>100                             | 1 M KOH<br>+ 0.1 M<br>KNO <sub>3</sub>                                                  | 650 mmol g <sup>-1</sup><br>cath <sup>-1</sup><br>@ -0.15 V vs.<br>RHE      | 95                          | Energy Environ. Sci.,<br>2021, 14,<br>4989-4997.             |
| R-NiCu-OH                                  | 1 M KOH<br>+ 0.1 M<br>KNO <sub>3</sub>                                                  | 23 mg cm <sup>-2</sup> h <sup>-1</sup><br>@ -0.1 V vs.<br>RHE               | 72                          | Energy Environ. Sci.,<br>2022, 15, 3004.                     |
| Rh@Cu-<br>0.6%                             | 0.1 M<br>Na <sub>2</sub> SO <sub>4</sub> (pH<br>11.5) + 0.1 M<br>KNO <sub>3</sub>       | 1.27 mmol h <sup>-1</sup><br>cm <sup>-2</sup><br>at -0.4 V vs.<br>RHE       | 93%<br>at -0.2 V vs.<br>RHE | Angew. Chem. Int. Ed.<br>2022, 61, e202202556.               |
| NiO/Cu/CF                                  | 1 M KOH<br>+ 0.1 M<br>KNO <sub>3</sub>                                                  | 455 mg h <sup>-1</sup><br>cm <sup>-2</sup> @ -0.3 V<br>vs. RHE              | 97                          | This work                                                    |

## REFERENCES

1. W. He, J. Zhang, S. Dieckhofer, S. Varhade, A. C. Brix, A. Lielpetere, S. Seisel, J. R. C. Junqueira and W. Schuhmann, *Nat Commun*, 2022, **13**, 1129.
2. Y. Wang, W. Zhou, R. Jia, Y. Yu and B. Zhang, *Angew. Chem. Int. Ed. Engl.*, 2020, **59**, 5350-5354.
3. Z. Gong, W. Zhong, Z. He, Q. Liu, H. Chen, D. Zhou, N. Zhang, X. Kang and Y. Chen, *Appl. Catal., B*, 2022, **305**.
4. R. Hao, L. Tian, C. Wang, L. Wang, Y. Liu, G. Wang, W. Li and G. A. Ozin, *Chem Catalysis*, 2022, **2**, 622-638.
5. Z. Fang, Z. Jin, S. Tang, P. Li, P. Wu and G. Yu, *ACS Nano*, 2022, **16**, 1072-1081.
6. S. Ye, Z. Chen, G. Zhang, W. Chen, C. Peng, X. Yang, L. Zheng, Y. Li, X. Ren, H. Cao, D. Xue, J. Qiu, Q. Zhang and J. Liu, *Energy & Environ. Sci.*, 2022, **15**, 760-770.
7. J. Wang, C. Cai, Y. Wang, X. Yang, D. Wu, Y. Zhu, M. Li, M. Gu and M. Shao, *ACS Catalysis*, 2021, **11**, 15135-15140.
8. Q. Hu, Y. Qin, X. Wang, Z. Wang, X. Huang, H. Zheng, K. Gao, H. Yang, P. Zhang, M. Shao and C. He, *Energy & Environ. Sci.*, 2021, **14**, 4989-4997.
9. S. Li, P. Ma, C. Gao, L. Liu, X. Wang, M. Shakouri, R. Chernikov, K. Wang, D. Liu, R. Ma and J. Wang, *Energy & Environ. Sci.*, 2022, **15**, 3004-3014.
10. R. Jia, Y. Wang, C. Wang, Y. Ling, Y. Yu and B. Zhang, *ACS Catalysis*, 2020, **10**, 3533-3540.
11. J. Li, G. Zhan, J. Yang, F. Quan, C. Mao, Y. Liu, B. Wang, F. Lei, L. Li, A. W. M. Chan, L. Xu, Y. Shi, Y. Du, W. Hao, P. K. Wong, J. Wang, S. X. Dou, L. Zhang and J. C. Yu, *J Am Chem Soc*, 2020, **142**, 7036-7046.
12. I. Katsounaros, *Curr Opin Electrochem*, 2021, **28**.
13. G.-F. Chen, Y. Yuan, H. Jiang, S.-Y. Ren, L.-X. Ding, L. Ma, T. Wu, J. Lu and H. Wang, *Nature Energy*, 2020, **5**, 605-613.
14. Y. Wang, A. Xu, Z. Wang, L. Huang, J. Li, F. Li, J. Wicks, M. Luo, D. H. Nam, C. S. Tan, Y. Ding, J. Wu, Y. Lum, C. T. Dinh, D. Sinton, G. Zheng and E. H. Sargent, *J Am Chem Soc*, 2020, **142**, 5702-5708.
15. P. Li, Z. Jin, Z. Fang and G. Yu, *Energy & Environ. Sci.*, 2021, **14**, 3522-3531.
16. Z. Y. Wu, M. Karamad, X. Yong, Q. Huang, D. A. Cullen, P. Zhu, C. Xia, Q. Xiao, M. Shakouri, F. Y. Chen, J. Y. T. Kim, Y. Xia, K. Heck, Y. Hu, M. S. Wong, Q. Li, I. Gates, S. Siahrostami and H. Wang, *Nat Commun*, 2021, **12**, 2870.
17. Z. Geng, Y. Liu, X. Kong, P. Li, K. Li, Z. Liu, J. Du, M. Shu, R. Si and J. Zeng, *Adv Mater*, 2018, e1803498.
18. H. Liu, X. Lang, C. Zhu, J. Timoshenko, M. Ruscher, L. Bai, N. Guijarro, H. Yin, Y. Peng, J. Li, Z. Liu, W. Wang, B. R. Cuenya and J. Luo, *Angew. Chem. Int. Ed. Engl.*, 2022, **61**, e202202556.
